# Supplementary material for: A multi-task convolutional deep neural network for variant calling in single molecule sequencing
Source: PubMed Central journal article supplement (PMC6397153; doi:10.1038/s41467-019-09025-z), 2019-03-01
Supplement: 41467_2019_9025_MOESM3_ESM.pdf [file 41467_2019_9025_MOESM3_ESM.pdf]

## Description of Additional Supplementary Files

Supplementary Data 1:  
3,135 potential novel variants.
